# Supplementary material for: Assessment of Evolution of Mountain Lakes and Risks of Glacier Lake Outbursts in theDjungarskiy (Jetysu) Alatau, Central Asia, using Landsat Imagery and Glacier Bed TopographyModelling
Source: Copernicus journal article supplement (doi:10.5194/nhess-2017-134), 2017-05-29
Supplement: Supplementary file 1 [file nhess-2017-134-supplement.zip]

Table S1. Characteristics of glacierized areas in the individual river basins (Severskiy et al., 2016). Locations of the river basins are shown in Fig. 1.

| Basin           | 2000 |                         | 2011 |                         | Change in number of glaciers | Reduction in glacierized area |      |
|-----------------|------|-------------------------|------|-------------------------|------------------------------|-------------------------------|------|
|                 | No   | Area (km <sup>2</sup> ) | No   | Area (km <sup>2</sup> ) |                              | km <sup>2</sup>               | %    |
| Aksu            | 97   | 44.2                    | 109  | 38.1                    | +12                          | 6.1                           | 13.9 |
| Sarkand         | 67   | 35.6                    | 74   | 30.6                    | +7                           | 4.9                           | 13.9 |
| Lepsy           | 59   | 52.0                    | 65   | 48.3                    | +6                           | 3.8                           | 7.2  |
| Bien            | 34   | 18.8                    | 35   | 16.7                    | +1                           | 2.1                           | 11.2 |
| Baskan          | 82   | 50.1                    | 87   | 47.8                    | +5                           | 2.3                           | 4.6  |
| Koktal          | 33   | 7.8                     | 24   | 5.9                     | -9                           | 1.9                           | 24.1 |
| Chija           | 12   | 4.6                     | 10   | 3.9                     | -2                           | 0.7                           | 14.9 |
| Usek            | 253  | 63.1                    | 272  | 56.2                    | +19                          | 6.9                           | 10.9 |
| Koksu           | 245  | 69.7                    | 173  | 57.8                    | -72                          | 11.9                          | 17.1 |
| Kora            | 80   | 49.9                    | 64   | 45.6                    | -16                          | 4.3                           | 8.5  |
| Kokmoin         | 0    | 0                       | 0    | 0                       | 0                            | 0                             | 0    |
| Tastau          | 24   | 10.2                    | 26   | 8.2                     | +2                           | 2.0                           | 19.6 |
| Tentek          | 69   | 45.9                    | 79   | 39.8                    | +10                          | 6.1                           | 13.3 |
| Vtoroi Tentek   | 34   | 3.6                     | 33   | 2.5                     | -1                           | 1.1                           | 30.3 |
| Khorgos         | 209  | 70.7                    | 228  | 63.9                    | +19                          | 6.8                           | 9.7  |
| Total / average | 1298 | 526.2                   | 1279 | 465.3                   | -19                          | 60.9                          | 14.2 |
