# Supplementary material for: Assessment of Evolution of Mountain Lakes and Risks of Glacier Lake Outbursts in theDjungarskiy (Jetysu) Alatau, Central Asia, using Landsat Imagery and Glacier Bed TopographyModelling
Source: Copernicus journal article supplement (doi:10.5194/nhess-2017-134), 2017-05-29
Supplement: Supplementary file 2 [file nhess-2017-134-supplement.zip]

Table S3. A catalogue of potentially dangerous lakes in the Djungarskiy Alatau. Peak discharge values represent the ‘worst case’ scenario following complete emptying of lake basins. Area change between 2002 and 2014 is shown. ‘\*’ sign denotes that the lake is a part of a cascade of lakes. Lakes, which outburst before, are highlighted in bold. Lake N25 (Kapkan) has been artificially lowered several times since August 2014.

| No  | River basin | Coordinates (N, E)                     | Area 2014 (m <sup>2</sup> ) | Volume (10 <sup>3</sup> m <sup>3</sup> ) | Discharge (m <sup>3</sup> s <sup>-1</sup> ) | Area change (%) | Lake type | Potential damage to                                                                   |
|-----|-------------|----------------------------------------|-----------------------------|------------------------------------------|---------------------------------------------|-----------------|-----------|---------------------------------------------------------------------------------------|
| 40* | Usek        | 44° 45' 22.029" N<br>79° 56' 44.166" E | 222,375                     | 3,346                                    | 6,692                                       | 0               | 1         | Two settlements (~500 houses), roads, agricultural fields, bridges, irrigation canals |
| 5   | Usek        | 44° 42' 48.546" N<br>79° 52' 28.975" E | 202,164                     | 2,903                                    | 5,807                                       | 29              | 1         |                                                                                       |
| 7*  | Usek        | 44° 40' 50.776" N<br>79° 33' 29.316" E | 39,024                      | 251                                      | 502                                         | 53              | 1         |                                                                                       |
| 27  | Usek        | 44° 34' 10.087" N<br>80° 13' 30.169" E | 34,369                      | 208                                      | 416                                         | 0               | 2         |                                                                                       |
| 83  | Usek        | 44° 41' 41.633" N<br>79° 44' 12.103" E | 28,766                      | 160                                      | 319                                         | 0               | 2         |                                                                                       |
| 1   | Usek        | 44° 42' 7.629" N<br>79° 39' 50.794" E  | 26,084                      | 138                                      | 276                                         | 129             | 2         |                                                                                       |
| 4*  | Usek        | 44° 42' 25.161" N<br>79° 55' 21.543" E | 23662                       | 129                                      | 239                                         | 25              | 1         |                                                                                       |
| 8   | Usek        | 44° 32' 59.693" N<br>80° 12' 43.673" E | 22,104                      | 108                                      | 216                                         | -19             | 2         |                                                                                       |
| 25* | Khorgos     | 44° 48' 14.059" N<br>80° 5' 1.557" E   | 198,437                     | 2,824                                    | 5,648                                       | 0               | 2         | Settlements, international trading centre, roads, bridges, agricultural fields        |
| 19* | Khorgos     | 44° 47' 16.294" N<br>80° 5' 25.250" E  | 74,989                      | 664                                      | 1,327                                       | 0               | 2         |                                                                                       |
| 10* | Khorgos     | 44° 49' 13.359" N<br>80° 14' 8.926" E  | 38,976                      | 251                                      | 503                                         | 0               | 2         |                                                                                       |
| 35* | Khorgos     | 44° 33' 58.749" N<br>80° 17' 0.083" E  | 32,851                      | 194                                      | 389                                         | 16              | 2         |                                                                                       |
| 32* | Khorgos     | 44° 42' 31.219" N<br>80° 7' 47.183" E  | 32,179                      | 189                                      | 377                                         | 0               | 2         |                                                                                       |

|            |                |                                               |                |             |              |          |          |                                                                                             |
|------------|----------------|-----------------------------------------------|----------------|-------------|--------------|----------|----------|---------------------------------------------------------------------------------------------|
| <b>43*</b> | <b>Sarkand</b> | <b>45° 4' 43.886" N<br/>79° 55' 56.627" E</b> | <b>115,999</b> | <b>1270</b> | <b>2,540</b> | <b>0</b> | <b>2</b> | Town of Sarkand, roads, dam, bridges, water abstraction facilities                          |
| 29*        | Sarkand        | 45° 5' 2.454" N<br>80° 4' 48.752" E           | 29,664         | 167         | 334          | 64       | 1        |                                                                                             |
| 44*        | Sarkand        | 45° 4' 40.984" N<br>79° 55' 34.597" E         | 27,331         | 148         | 296          | 108      | 2        |                                                                                             |
| 49         | Sarkand        | 45° 4' 55.047" N<br>79° 55' 56.840" E         | 23,687         | 120         | 239          | 0        | 2        |                                                                                             |
| 28         | Tentek         | 45° 15' 13.393" N<br>80° 47' 38.957" E        | 114,343        | 1243        | 2,486        | 0        | 2        | Village and individual houses, roads, bridges                                               |
| 3          | Tentek         | 45° 10' 28.710" N<br>80° 59' 18.348" E        | 86,172         | 816         | 1,632        | 0        | 2        |                                                                                             |
| 34         | Tentek         | 45° 15' 49.845" N<br>80° 48' 43.902" E        | 70,692         | 608         | 1,215        | 0        | 2        |                                                                                             |
| 31*        | Aksu           | 44° 58' 44.198"N<br>79° 42' 19.635"E          | 80,550         | 738         | 1,476        | 0        | 1        | Village, individual houses, reservoir, farm, roads, bridges, electricity transmission lines |
| 33         | Aksu           | 44° 58' 53.154" N<br>79° 31' 50.235" E        | 71,694         | 621         | 1,241        | 0        | 2        |                                                                                             |
| 9*         | Aksu           | 44° 56' 54.523" N<br>79° 35' 28.978" E        | 68,825         | 584         | 1,168        | 57       | 1        |                                                                                             |
| 13*        | Aksu           | 44° 56' 46.294" N<br>79° 36' 7.137" E         | 67,015         | 561         | 1,123        | 121      | 1        |                                                                                             |
| 41*        | Aksu           | 45° 2' 58.394" N<br>79° 49' 59.089" E         | 44,422         | 305         | 609          | 69       | 1        |                                                                                             |
| 6*         | Aksu           | 45° 2' 45.471" N<br>79° 50' 37.556" E         | 39,638         | 257         | 514          | 14       | 2        |                                                                                             |
| 38         | Aksu           | 45° 4' 18.516" N<br>79° 45' 43.165" E         | 36,622         | 229         | 457          | 94       | 1        |                                                                                             |
| 39*        | Aksu           | 45° 4' 28.929" N<br>79° 47' 3.660" E          | 34,445         | 209         | 417          | 166      | 1        |                                                                                             |
| <b>45*</b> | <b>Aksu</b>    | <b>45° 3' 21.869" N<br/>79° 41' 55.655" E</b> | <b>21,070</b>  | <b>100</b>  | <b>201</b>   | <b>0</b> | <b>2</b> |                                                                                             |
| 15*        | Aksu           | 44° 56' 51.057" N<br>79° 36' 30.445" E        | 18,076         | 78          | 160          | 72       | 1        |                                                                                             |
| 17*        | Aksu           | 44° 56' 46.833" N<br>79° 36' 52.804" E        | 11,055         | 39          | 77           | 0        | 2        |                                                                                             |
| 50*        | Aksu           | 44° 58' 35.636" N                             | 9,809          | 32          | 65           | 522      | 1        |                                                                                             |

|     |        |                                        |        |     |       |     |   |                                                           |
|-----|--------|----------------------------------------|--------|-----|-------|-----|---|-----------------------------------------------------------|
|     |        | 79° 31' 56.610" E                      |        |     |       |     |   |                                                           |
| 18* | Bien   | 44° 58' 22.232" N<br>79° 25' 38.218" E | 49,802 | 361 | 722   | 0   | 1 | Village, individual houses, roads,<br>agricultural fields |
| 16* | Bien   | 44° 58' 44.285" N<br>79° 25' 7.825" E  | 11,449 | 41  | 81    | New | 1 |                                                           |
| 14* | Bien   | 44° 59' 7.573" N<br>79° 25' 5.355" E   | 47,647 | 338 | 676   | -18 | 2 |                                                           |
| 22* | Bien   | 44° 57' 42.138" N<br>79° 28' 43.327" E | 44,262 | 303 | 606   | New | 1 |                                                           |
| 23* | Bien   | 44° 58' 7.044" N<br>79° 28' 19.236" E  | 36,957 | 232 | 463   | 0   | 2 |                                                           |
| 21* | Bien   | 44° 57' 57.318" N<br>79° 28' 38.144" E | 19,088 | 87  | 173   | 0   | 2 |                                                           |
| 24  | Bien   | 44° 58' 10.910" N<br>79° 27' 53.807" E | 79,777 | 728 | 1,455 | 0   | 2 |                                                           |
| 30  | Kora   | 44° 53' 52.431" N<br>79° 18' 17.413" E | 60,913 | 487 | 974   | 0   | 2 | Town of Tekele, individual houses,<br>roads, bridges      |
| 26  | Kora   | 44° 59' 3.108" N<br>79° 10' 49.257" E  | 58,438 | 458 | 916   | 0   | 1 |                                                           |
| 11* | Kora   | 44° 55' 21.910" N<br>79° 14' 1.043" E  | 49,391 | 356 | 713   | 0   | 2 |                                                           |
| 20* | Kora   | 44° 54' 24.098" N<br>79° 15' 49.497" E | 30,820 | 177 | 354   | 98  | 1 |                                                           |
| 36* | Kora   | 44° 55' 29.887" N<br>79° 12' 24.359" E | 17,308 | 75  | 150   | 0   | 2 |                                                           |
| 47  | Koksu  | 44° 53' 0.591" N<br>79° 20' 16.281" E  | 36,748 | 230 | 459   | 0   | 2 | Road, bridges                                             |
| 12  | Koktal | 44° 39' 34.368" N<br>79° 10' 7.513" E  | 36,438 | 227 | 453   | 0   | 2 | Village, road, irrigation canal                           |
| 48  | Koktal | 44° 39' 15.092" N<br>79° 12' 6.832" E  | 32,265 | 189 | 378   | 0   | 2 |                                                           |
| 42* | Lepsy  | 45° 6' 54.407" N<br>80° 35' 46.723" E  | 27,464 | 149 | 298   | 0   | 1 | Roads, bridges, agricultural fields                       |
| 37* | Lepsy  | 45° 8' 23.802" N<br>80° 33' 11.708" E  | 25,941 | 137 | 274   | 299 | 1 |                                                           |
| 2   | Lepsy  | 45° 10' 56.601" N<br>80° 29' 14.173" E | 22,552 | 111 | 222   | 0   | 2 |                                                           |
