# Supplementary material for: Assessment of Evolution of Mountain Lakes and Risks of Glacier Lake Outbursts in theDjungarskiy (Jetysu) Alatau, Central Asia, using Landsat Imagery and Glacier Bed TopographyModelling
Source: Copernicus journal article supplement (doi:10.5194/nhess-2017-134), 2017-05-29
Supplement: Supplementary file 3 [file nhess-2017-134-supplement.zip]

Table S2. Number and combined area of lakes in the river basins. Elevation range is given for 2002 with a changed upper boundary for 2014 in parentheses if different. Locations of the basins is shown in Fig. 1. Basin areas are calculated to the locations where the rivers exit the mountains. The proportion of glacierized area is as in 2000 (Table S1).

| Basin            |                            |                  | Lakes |                         |      |                         |                         |
|------------------|----------------------------|------------------|-------|-------------------------|------|-------------------------|-------------------------|
| Name             | Area<br>(km <sup>2</sup> ) | %<br>glacierized | 2002  |                         | 2014 |                         | Elevation<br>(m a.s.l.) |
|                  |                            |                  | No    | Area (km <sup>2</sup> ) | No   | Area (km <sup>2</sup> ) |                         |
| Aksu             | 754                        | 5.9              | 73    | 2.44±0.122              | 76   | 2.70±0.135              | 2870-3530               |
| Sarkand          | 425                        | 8.4              | 30    | 0.88±0.044              | 31   | 0.85±0.044              | 2910-3410<br>(3570)     |
| Lepsy            | 1269                       | 4.1              | 23    | 1.30±0.061              | 22   | 1.37±0.065              | 2270-3460               |
| Bien             | 354                        | 5.3              | 24    | 0.40±0.025              | 28   | 0.46±0.031              | 2980-3370               |
| Baskan           | 595                        | 8.4              | 24    | 0.45±0.025              | 22   | 0.43±0.025              | 2640-3550               |
| Koktal           | 359                        | 2.2              | 12    | 0.11±0.008              | 17   | 0.14±0.01               | 3080-3320<br>(3500)     |
| Chija            | 730                        | 0.6              | 11    | 0.10±0.007              | 13   | 0.13±0.009              | 3000-3330               |
| Usek             | 1510                       | 4.2              | 110   | 3.13±0.162              | 112  | 3.31±0.17               | 2700-3660               |
| Koksu            | 1621                       | 4.3              | 104   | 2.22±0.127              | 108  | 2.50±0.142              | 2470-3580               |
| Kora             | 470                        | 10.6             | 39    | 0.64±0.039              | 45   | 0.77±0.046              | 2860-3450               |
| Kokmoin          | 228                        | 0                | 23    | 0.39±0.024              | 23   | 0.40±0.025              | 2770-3305               |
| Tastau           | 669                        | 1.5              | 5     | 0.46±0.019              | 7    | 0.47±0.02               | 3090-3240               |
| Tentek           | 1008                       | 4.6              | 42    | 0.89±0.049              | 48   | 0.95±0.054              | 2470-3410<br>(3540)     |
| Vtoroi<br>Tentek | 545                        | 0.7              | 37    | 0.98±0.054              | 36   | 0.95±0.053              | 2380-3410               |
| Horgos           | 1183                       | 6.0              | 42    | 1.89±0.088              | 48   | 1.93±0.091              | 2230-3660<br>(3690)     |

|                 |        |     |     |            |     |            |   |
|-----------------|--------|-----|-----|------------|-----|------------|---|
| Total /<br>mean | 11,720 | 4.8 | 599 | 16.26±0.85 | 636 | 17.35±0.92 | - |
|-----------------|--------|-----|-----|------------|-----|------------|---|
